# Supplementary material for: CT-like images in MRI improve specificity of erosion detection in patients with hand arthritis: a diagnostic accuracy study with CT as standard of reference
Source: HighWire-hosted journal article supplement (doi:10.1136/rmdopen-2021-002089), 2022-02-01
Supplement: rmdopen-2021-002089supp001_data_supplement.pdf [file rmdopen-2021-002089supp001_data_supplement.pdf]

|                |     |     |       |     |      |              |
|----------------|-----|-----|-------|-----|------|--------------|
| <b>T1w/CT</b>  | CT+ | CT- | Total | SE  | 1.00 | 0.80 to 1.00 |
| T1w+           | 15  | 12  | 27    | SP  | 0.43 | 0.24 to 0.63 |
| T1w-           | 0   | 9   | 9     | DA  | 0.67 | 0.49 to 0.81 |
| Total          | 15  | 21  | 36    | PPV | 0.56 | 0.37 to 0.72 |
|                |     |     |       | NPV | 1.00 | 0.70 to 1.00 |
| <b>VIBE/CT</b> |     |     |       |     |      |              |
| VIBE+          | 14  | 11  | 25    | SP  | 0.48 | 0.28 to 0.68 |
| VIBE-          | 1   | 10  | 11    | DA  | 0.67 | 0.49 to 0.81 |
| Total          | 15  | 21  | 36    | PPV | 0.56 | 0.37 to 0.73 |
|                |     |     |       | NPV | 0.91 | 0.62 to 1.00 |
| <b>SWI/CT</b>  |     |     |       |     |      |              |
| SWI+           | 12  | 1   | 13    | SP  | 0.95 | 0.77 to 1.00 |
| SWI-           | 3   | 20  | 23    | DA  | 0.89 | 0.74 to 0.97 |
| Total          | 15  | 21  | 36    | PPV | 0.92 | 0.67 to 1.00 |
|                |     |     |       | NPV | 0.87 | 0.68 to 0.95 |

*Supplementary Table 1: Results of contingency table analysis on per-wrist level. SWI = susceptibility-weighted imaging, VIBE = volumetric interpolated breath-hold examination, T1w = T1-weighted imaging sequence, CT = computed tomography, SE = sensitivity, SP = specificity, DA = diagnostic accuracy, PPV = positive predictive value, NPV = negative predictive value.*
