# Supplementary material for: CT-like images in MRI improve specificity of erosion detection in patients with hand arthritis: a diagnostic accuracy study with CT as standard of reference
Source: HighWire-hosted journal article supplement (doi:10.1136/rmdopen-2021-002089), 2022-02-01
Supplement: rmdopen-2021-002089supp002_data_supplement.pdf [file rmdopen-2021-002089supp002_data_supplement.pdf]

|                |     |     |       |     |      |              |
|----------------|-----|-----|-------|-----|------|--------------|
| <b>T1w/CT</b>  | CT+ | CT- | Total | SE  | 0.90 | 0.60 to 0.99 |
| T1w+           | 9   | 7   | 16    | SP  | 0.73 | 0.54 to 0.86 |
| T1w-           | 1   | 19  | 20    | DA  | 0.78 | 0.61 to 0.90 |
| Total          | 10  | 26  | 36    | PPV | 0.56 | 0.33 to 0.77 |
|                |     |     |       | NPV | 0.95 | 0.76 to 1.00 |
| <b>VIBE/CT</b> |     |     |       |     |      |              |
| VIBE+          | 10  | 3   | 13    | SP  | 0.88 | 0.71 to 0.96 |
| VIBE-          | 0   | 23  | 23    | DA  | 0.92 | 0.77 to 0.98 |
| Total          | 10  | 26  | 36    | PPV | 0.77 | 0.50 to 0.92 |
|                |     |     |       | NPV | 1.00 | 0.86 to 1.00 |
| <b>SWI/CT</b>  |     |     |       |     |      |              |
| SWI+           | 8   | 1   | 9     | SP  | 0.96 | 0.81 to 1.00 |
| SWI-           | 2   | 25  | 27    | DA  | 0.92 | 0.78 to 0.98 |
| Total          | 10  | 26  | 36    | PPV | 0.89 | 0.57 to 0.99 |
|                |     |     |       | NPV | 0.93 | 0.77 to 0.99 |

Supplementary Table 2: Results of contingency table analysis on per-metacarpophalangeal level. SWI = susceptibility-weighted imaging, VIBE = volumetric interpolated breath-hold examination, T1w = T1-weighted imaging sequence, CT = computed tomography, SE = sensitivity, SP = specificity, DA = diagnostic accuracy, PPV = positive predictive value, NPV = negative predictive value.
